# Supplementary material
Source: Springer Nature journal article supplement (https://www.springermedizin.de/resource/supplementary/12885_2008_1204_MOESM9_ESM.pdf/9471400)

**A**

100 X

200 X

400 X

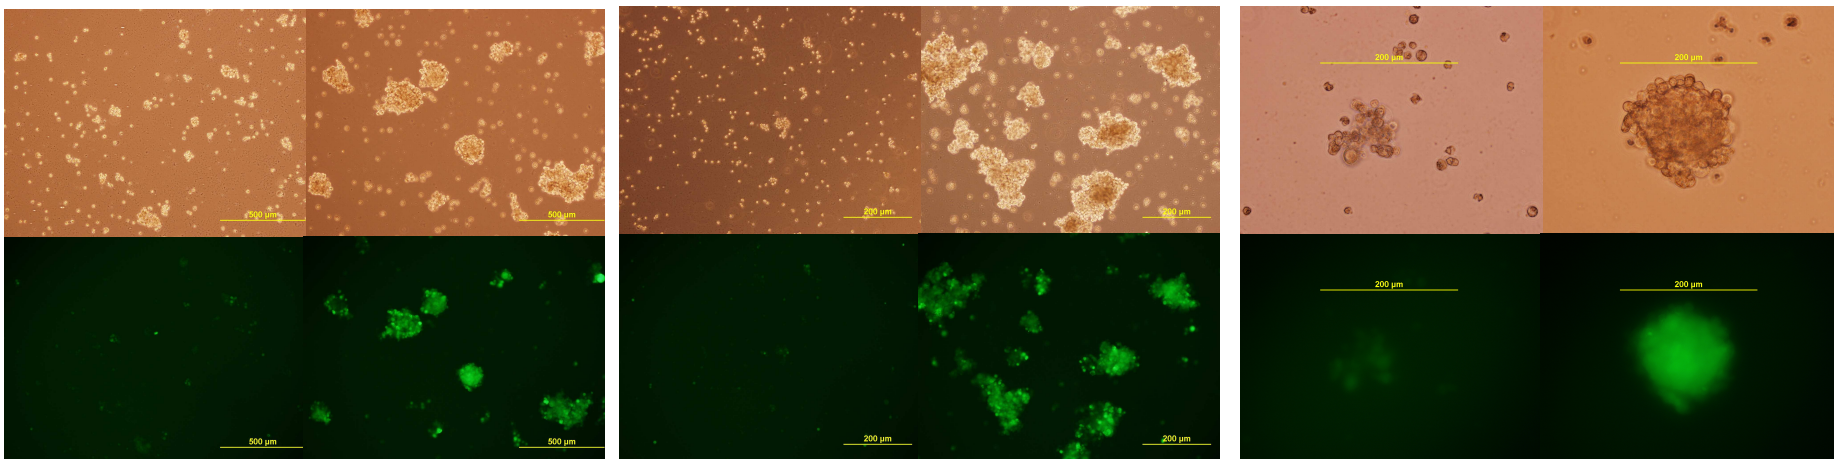

miR-34a-MIF

MIF

miR-34a-MIF

MIF

miR-34a-MIF

MIF

**B**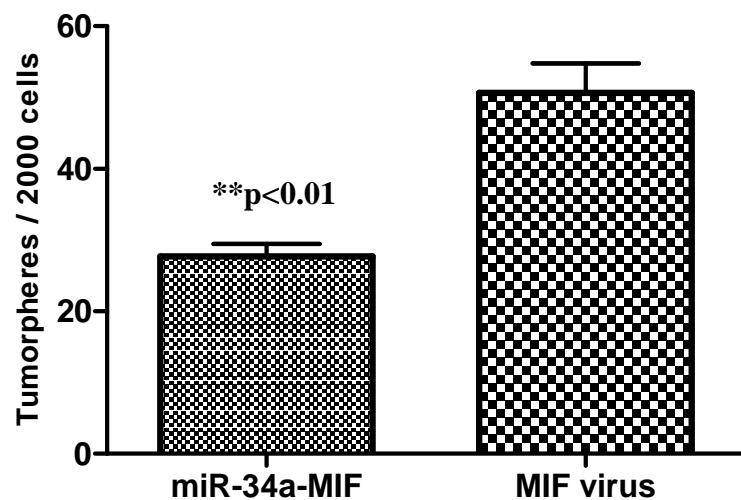**C**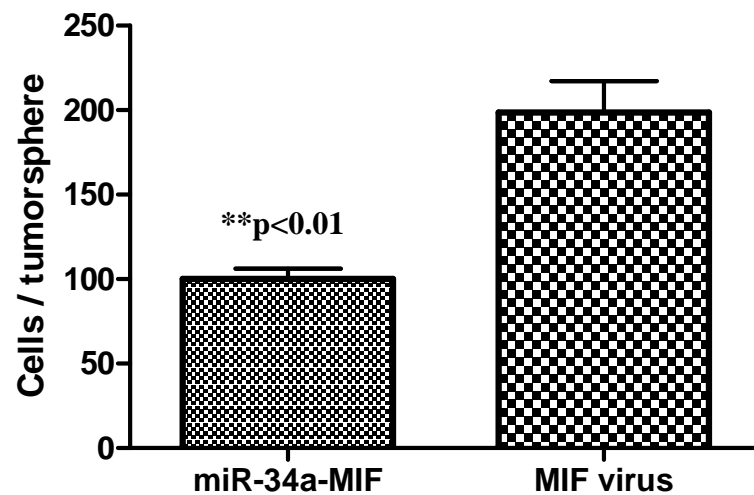

Supplement: MOESM9 [file 9471400]
